# Supplementary material for: Ultrastructure of the gills ciliary epithelium of Limnoperna fortunei (Dunker 1857), the invasive golden mussel
Source: Research Square preprint supplement (doi:10.21203/rs.3.rs-76648/v1), 2021-02-24
Supplement: Supplementary file 1 [file 367172aed6129557ce611d9f.docx]

**Supplementary Material**

**Ultrastructure of the gills ciliary epithelium of Limnoperna fortunei (Dunker 1857), the invasive golden mussel**

Erico Tadeu Fraga Freitas1,2,3, Amanda Maria Siqueira Moreira1,4, Rayan Silva de Paula1,4, Gabriela Rabelo Andrade1; Marcela David de Carvalho5, Paulo Santos Assis3, Antônio Valadão Cardoso1,6, Erika Cristina Jorge4

1 Centro de Bioengenharia de Espécies Invasoras de Hidrelétricas (CBEIH), Belo Horizonte, MG, 31035-536, Brazil.

2 Universidade Federal de Minas Gerais (UFMG), Centro de Microscopia, Belo Horizonte, MG, 31270-901, Brazil.

3 Universidade Federal de Ouro Preto (UFOP), FIMAT, Ouro Preto, MG, 35400-000, Brazil.

4 Universidade Federal de Minas Gerais (UFMG), Instituto de Ciências Biológicas, Belo Horizonte, MG, 31270-901, Brazil.

5 Companhia Energética de Minas Gerais SA (CEMIG), Belo Horizonte, MG, 30190-131, Brazil.

6 Universidade do Estado de Minas Gerais (UEMG), Escola de Design, Belo Horizonte, MG, 30140-091, Brazil.

**Additional file 1** TEM bright field images showing the detail microtubule cytoskeleton of laterofrontal cilia in cross-section (c) and longitudinal (b) views

**Additional file 2** Transmitted light microscopy of the plastic embedded block of the mussel gill in specimen VR
